# Supplementary material
Source: Springer Nature journal article supplement (https://www.springermedizin.de/resource/supplementary/12967_2011_1056_MOESM2_ESM.pdf/9573672)

A

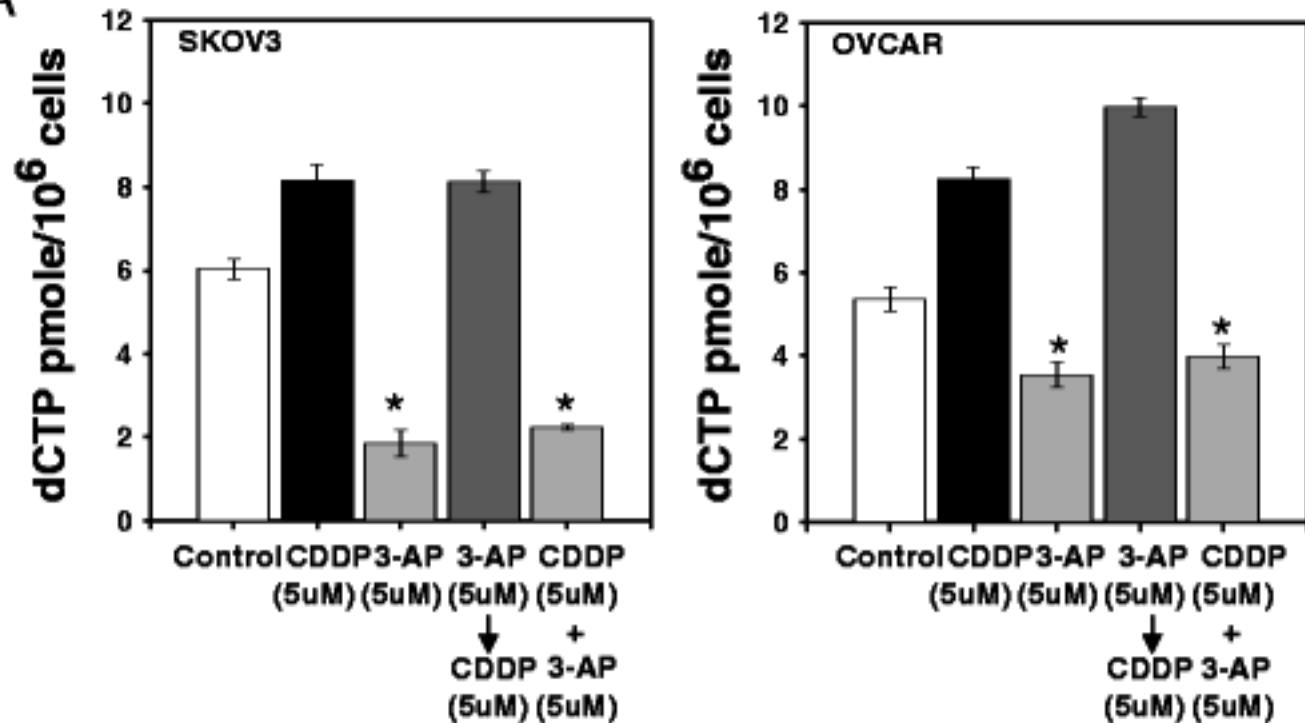

B

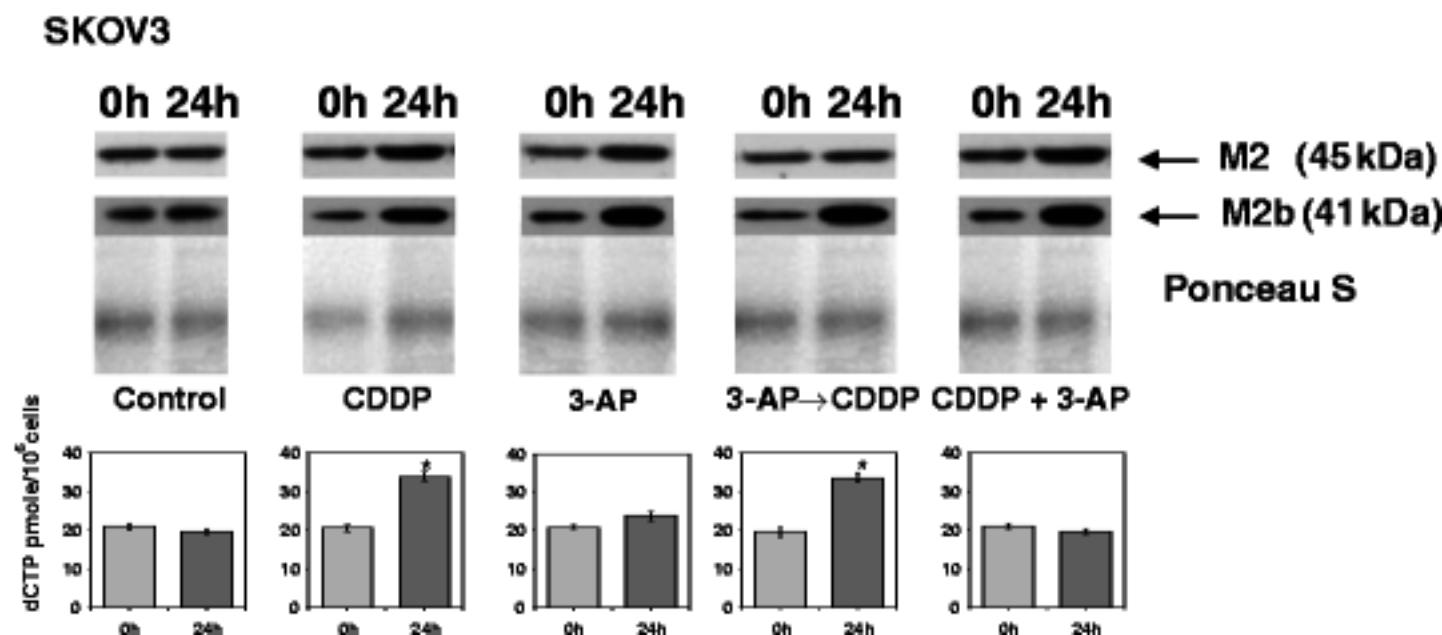

Supplement: MOESM2 [file 9573672]
